# Supplementary material
Source: PubMed Central journal article supplement (PMC7457746)
Supplement: NIHMS1620976-supplement-Supplement.pdf [file NIHMS1620976-supplement-Supplement.pdf]

## SUPPLEMENTAL MATERIAL

### **Optimal Duration of Aspirin plus Clopidogrel After Ischemic Stroke or TIA: A Systematic Review and Meta-Analysis**

Hammad Rahman, MD; Safi U. Khan, MD; Fahad Nasir, MD; Tehseen Hammad, MBBS; Michael A. Meyer, MD; Edo Kaluski, MD, FACC

#### Contents

|                                                                                                                                                   |         |
|---------------------------------------------------------------------------------------------------------------------------------------------------|---------|
| <b>Table I:</b> Cochrane quality assessment tool for assessment of risk of bias for the randomized trials -----                                   | Page 2  |
| <b>Table II:</b> Major bleeding Criteria-----                                                                                                     | Page 3  |
| <b>Table III:</b> Estimates presented as absolute risk difference (RD) with 95% confidence Interval (CI) -----                                    | Page 4  |
| <b>Table IV.</b> Baseline Characteristics -----                                                                                                   | Page 5  |
| <b>Table V</b> Meta regression analysis on recurrent ischemic stroke and major bleeding -----                                                     | Page 6  |
| <b>Table VI:</b> Ongoing trials-----                                                                                                              | Page 7  |
| <b>Search Strategy</b> -----                                                                                                                      | Page 8  |
| <b>Figure I:</b> Forest plot comparing aspirin plus clopidogrel (A+C) with aspirin alone (A) for major adverse cardiovascular events (MACE) ----- | Page 9  |
| <b>Figure II:</b> Forest plot comparing aspirin plus clopidogrel (A+C) with aspirin alone (A) for all-cause mortality -----                       | Page 10 |

| Studies                                            | Randomization | Allocation concealment | Blinding | Deviation from intended intervention | Outcome assessment bias | Free of other biases |
|----------------------------------------------------|---------------|------------------------|----------|--------------------------------------|-------------------------|----------------------|
| POINT 2018 <sup>1</sup>                            | Green         | Green                  | Green    | Green                                | Green                   | Green                |
| COMPRESS 2016 <sup>2</sup>                         | Green         | Green                  | Green    | Green                                | Green                   | Green                |
| He et al 2014 <sup>3</sup>                         | Green         | Green                  | Red      | Green                                | Green                   | Green                |
| Yi et al 2014 <sup>4</sup>                         | Green         | Green                  | Red      | Green                                | Green                   | Green                |
| CHANCE 2013 <sup>5</sup>                           | Green         | Green                  | Green    | Green                                | Green                   | Green                |
| SPS 3 2012 <sup>6</sup>                            | Green         | Green                  | Green    | Green                                | Green                   | Green                |
| CLAIR 2010 <sup>7</sup>                            | Green         | Green                  | Red      | Green                                | Green                   | Green                |
| FASTER 2007 <sup>8</sup>                           | Green         | Green                  | Green    | Green                                | Green                   | Green                |
| CHARISMA 2006 <sup>9</sup>                         | Green         | Green                  | Green    | Green                                | Green                   | White                |
| CARESS 2005 <sup>10</sup>                          | White         | Green                  | Green    | Green                                | Green                   | Green                |
| Low risk=Green; Unclear risk=White; High risk= Red |               |                        |          |                                      |                         |                      |

| <b>Study</b>               | <b>Major bleeding criteria</b>                                                                                                                                                                                                                                                                        |
|----------------------------|-------------------------------------------------------------------------------------------------------------------------------------------------------------------------------------------------------------------------------------------------------------------------------------------------------|
| POINT 2018 <sup>1</sup>    | Symptomatic intracranial hemorrhage, intraocular bleeding causing vision loss, transfusion of 2 or more units of red cells or an equivalent amount of whole blood, hospitalization or prolongation of an existing hospitalization, or death due to hemorrhage                                         |
| COMPRESS 2016 <sup>2</sup> | Intraocular hemorrhage, significant disability by bleeding, or requiring the transfusion of $\leq 3$ units of blood                                                                                                                                                                                   |
| He et al 2014 <sup>3</sup> | Not mentioned                                                                                                                                                                                                                                                                                         |
| Yi et al 2014 <sup>4</sup> | Any symptomatic intracranial hemorrhage or any hemorrhage requiring blood transfusion or prolonged hospitalization was considered as serious hemorrhage                                                                                                                                               |
| CHANCE 2013 <sup>5</sup>   | Global Utilization of Streptokinase and Tissue Plasminogen Activator for Occluded Coronary Arteries (GUSTO) definition                                                                                                                                                                                |
| SPS 3 2012 <sup>6</sup>    | Requiring transfusion of red cells or surgery or resulting in permanent functional sequelae or death                                                                                                                                                                                                  |
| CLAIR 2010 <sup>7</sup>    | Any symptomatic intracranial hemorrhage or any hemorrhage requiring blood transfusion or prolonged stay in hospital.                                                                                                                                                                                  |
| FASTER 2007 <sup>8</sup>   | Life threatening, resulting in hemodynamic compromise or hypovolemic shock, requiring inotropic support or other means to maintain cardiac output, requiring blood transfusion of more than 2 units of packed red blood cells, or associated with a fall in hemoglobin greater than or equal to 5 g/L |
| CHARISMA 2006 <sup>9</sup> | Global Utilization of Streptokinase and Tissue Plasminogen Activator for Occluded Coronary Arteries (GUSTO) definition                                                                                                                                                                                |
| CARESS 2005 <sup>10</sup>  | Not mentioned                                                                                                                                                                                                                                                                                         |

| <b>Endpoints</b>                    | <b>Studies (<i>n</i>)</b> | <b>RD (95 % CI)</b>     | <b>p-value</b> |
|-------------------------------------|---------------------------|-------------------------|----------------|
| <b>Short-term outcomes</b>          |                           |                         |                |
| Recurrent Ischemic Stroke           | 6                         | -0.035 (-0.047, -0.023) | <0.001         |
| Major bleeding                      | 7                         | 0.001 (-0.001, 0.002)   | 0.42           |
| Major adverse cardiovascular events | 5                         | -0.026 (-0.037, -0.015) | <0.001         |
| All-cause mortality                 | 4                         | -0.000 (-0.003, 0.004)  | 0.82           |
| <b>Mid-term outcomes</b>            |                           |                         |                |
| Recurrent Ischemic Stroke           | 2                         | -0.018 (-0.031, -0.006) | 0.004          |
| Major bleeding                      | 2                         | 0.012 (-0.006, 0.030)   | 0.21           |
| Major adverse cardiovascular events | 2                         | -0.016 (-0.029, -0.004) | 0.01           |
| All-cause mortality                 | 2                         | 0.003 (-0.001, 0.007)   | 0.20           |
| <b>Long-term outcomes</b>           |                           |                         |                |
| Recurrent Ischemic Stroke           | 2                         | -0.006 (-0.033, 0.022)  | 0.69           |
| Major bleeding                      | 2                         | 0.024 (0.003, 0.044)    | 0.02           |
| Major adverse cardiovascular events | 1                         | -0.015 (-0.037, 0.007)  | 0.19           |
| All-cause mortality                 | 1                         | 0.023 (0.006, 0.041)    | 0.01           |

| Studies                    | Arms | n     | Age (years) | Male (%) | Presentation |            | HTN (%) | IHD (%) | DM (%) | Smoking (%) | Prior Stroke (%) | Prior Aspirin use (%) | Prior Clopidogrel use (%) |
|----------------------------|------|-------|-------------|----------|--------------|------------|---------|---------|--------|-------------|------------------|-----------------------|---------------------------|
|                            |      |       |             |          | TIA (%)      | Stroke (%) |         |         |        |             |                  |                       |                           |
| POINT 2018 <sup>1</sup>    | A+C  | 2432  | 65.0        | 54.9     | 43.4         | 56.6       | 69.9    | 10.6    | 28.0   | 20.4        | -                | 58.3                  | 2.0                       |
|                            | A    | 2449  | 65.0        | 55.2     | 43.0         | 57.0       | 68.9    | 9.8     | 27.1   | 20.8        | -                | 57.0                  | 1.7                       |
| COMPRESS 2016 <sup>2</sup> | A+C  | 174   | 68.0        | 65.5     | 0.0          | 100        | 64.4    | 4.6     | 33.3   | 40.8        | 11.5             | -                     | -                         |
|                            | A    | 175   | 67.0        | 61.7     | 0.0          | 100        | 68.0    | 4.6     | 31.4   | 36.0        | 9.1              | -                     | -                         |
| He et al 2014 <sup>3</sup> | A+C  | 321   | 62.9        | 57       | 6.8          | 93.2       | 66.4    | 27.4    | 43.0   | 50.2        | 32.4             | -                     | -                         |
|                            | A    | 326   | 61.5        | 56.7     | 4.9          | 95.1       | 68.7    | 28.2    | 39.3   | 50.6        | 35.9             | -                     | -                         |
| Yi et al 2014 <sup>4</sup> | A+C  | 284   | 69.2        | 54.9     | -            | 100        | 71.8    | 1.4     | 37.0   | 39.4        | -                | 0.0                   | 0.0                       |
|                            | A    | 286   | 70.1        | 54.9     | -            | 100        | 73.4    | 1.0     | 38.5   | 40.6        | -                | 0.0                   | 0.0                       |
| CHANCE 2013 <sup>5</sup>   | A+C  | 2584  | 63.0        | 67.0     | 27.7         | 72.3       | 66.4    | 1.7     | 21.3   | 43.2        | 20.0             | 21.4                  | 0.5                       |
|                            | A    | 2586  | 62.0        | 65.3     | 28.2         | 71.8       | 65.1    | 2.0     | 21.0   | 42.7        | 20.0             | 22.1                  | 0.5                       |
| SPS 3 2012 <sup>6</sup>    | A+C  | 1517  | 63.0        | 62.0     | 3.0          | 97.0       | 76.0    | 10.0    | 35.0   | 20.0        | 15.0             | 28.0                  | -                         |
|                            | A    | 1503  | 63.0        | 64.0     | 3.0          | 97.0       | 74.0    | 11.0    | 38.0   | 21.0        | 15.0             | 28.0                  | -                         |
| CLAIR 2010 <sup>7</sup>    | A+C  | 46    | 59.2        | 78.0     | -            | -          | 60.0    | 7.0     | 46.0   | 46.0        | -                | -                     | -                         |
|                            | A    | 52    | 56.4        | 77.0     | -            | -          | 69.0    | 6.0     | 31.0   | 58.0        | -                | -                     | -                         |
| FASTER 2007 <sup>8</sup>   | A+C  | 198   | 68.0        | 57.6     | -            | -          | 46.5    | 5.6     | 12.1   | 27.3        | 6.1              | -                     | -                         |
|                            | A    | 194   | 68.2        | 48.4     | -            | -          | 54.6    | 4.1     | 9.3    | 24.7        | 8.8              | -                     | -                         |
| CHARISMA 2006 <sup>9</sup> | A+C  | 7802† | 64.0        | 70.3     | -            | -          | 73.3    | 34.2    | 42.3   | 20.1        | 24.9             | -                     | -                         |
|                            | A    | 7801† | 64.0        | 70.2     | -            | -          | 73.9    | 34.9    | 41.7   | 20.3        | 24.3             | -                     | -                         |
| CARESS 2005 <sup>10</sup>  | A+C  | 51    | 66.4        | 68.6     | 37.3         | 62.7       | 74.5    | 11.8    | 31.4   | -           | 5.9              | 90.2                  | -                         |
|                            | A    | 56    | 62.8        | 69.6     | 42.6         | 57.4       | 55.4    | 17.9    | 32.1   | -           | 7.1              | 92.9                  | -                         |

† Total trial population

Abbreviations: A, aspirin; C, clopidogrel; DM, diabetes mellitus; HTN, hypertension; IHD, ischemic heart disease; n, number of patients; TIA, transient ischemic attack.

| <b>Variables</b>                 | <b>Slope (95 % Confidence Interval)</b> | <b>P-value</b> |
|----------------------------------|-----------------------------------------|----------------|
| <b>Recurrent Ischemic Stroke</b> |                                         |                |
| Year                             | 0.001 (-0.043, 0.045)                   | 0.97           |
| Age (years)                      | -0.037 (-0.118, 0.045)                  | 0.37           |
| Male (%)                         | 0.003 (-0.020, 0.027)                   | 0.79           |
| Hypertension (%)                 | 0.010 (-0.014, 0.034)                   | 0.41           |
| Diabetes Mellitus                | 0.001 (-0.014, 0.017)                   | 0.88           |
| Ischemic Heart Disease (%)       | 0.002 (-0.019, 0.024)                   | 0.84           |
| Current Smoking (%)              | -0.006 (-0.016, 0.004)                  | 0.26           |
| <b>Major Bleeding</b>            |                                         |                |
| Year                             | 0.013 (-0.091, 0.117)                   | 0.80           |
| Age (years)                      | -0.069 (-0.289, 0.151)                  | 0.54           |
| Male (%)                         | 0.036 (-0.037, 0.108)                   | 0.33           |
| Hypertension (%)                 | 0.030 (-0.040, 0.099)                   | 0.40           |
| Diabetes Mellitus                | 0.001 (-0.066, 0.068)                   | 0.98           |
| Ischemic Heart Disease (%)       | -0.001 (-0.032, 0.029)                  | 0.93           |
| Current Smoking (%)              | -0.006 (-0.027, 0.015)                  | 0.57           |

|                                                                                                                                                                                                                                                                                                                                         |
|-----------------------------------------------------------------------------------------------------------------------------------------------------------------------------------------------------------------------------------------------------------------------------------------------------------------------------------------|
| <b>Ongoing trials</b>                                                                                                                                                                                                                                                                                                                   |
| The <b>THALES</b> (Acute STroke or Transient IscHemic Attack Treated with TicAgrelor and ASA for PrEvention of Stroke and Death; ClinicalTrials.gov Identifier: NCT03354429) comparing ticagrelor and aspirin combination with aspirin alone in patients with acute IS or TIA to evaluate the composite of stroke and death at 30 days. |
| The <b>CSPS.com</b> trial (Cilostazol Stroke Prevention Study for Antiplatelet Combination; ClinicalTrials.gov Identifier: NCT01995370) comparing the efficacy and safety of aspirin and cilostazol with aspirin or clopidogrel monotherapy in high risk stroke patients.                                                               |
| The <b>ATAMIS</b> (Antiplatelet Therapy in Acute Mild-Moderate Ischemic Stroke) (ClinicalTrials.gov Identifier: NCT02869009) comparing efficacy and safety of dual-antiplatelet therapy versus aspirin monotherapy in patients with acute mild-moderate ischemic stroke ( $4 \leq \text{NIHSS} \leq 10$ )                               |

### Search Strategy:

((("ischemia"[MeSH Terms] OR "ischemia"[All Fields] OR "ischemic"[All Fields]) AND ("stroke"[MeSH Terms] OR "stroke"[All Fields])) OR ("cerebral infarction"[MeSH Terms] OR ("cerebral"[All Fields] AND "infarction"[All Fields]) OR "cerebral infarction"[All Fields]) OR ("cerebrovascular disorders"[MeSH Terms] OR ("cerebrovascular"[All Fields] AND "disorders"[All Fields]) OR "cerebrovascular disorders"[All Fields] OR ("cerebrovascular"[All Fields] AND "disease"[All Fields]) OR "cerebrovascular disease"[All Fields]) OR ("transient ischaemic attacks"[All Fields] OR "ischemic attack, transient"[MeSH Terms] OR ("ischemic"[All Fields] AND "attack"[All Fields] AND "transient"[All Fields]) OR "transient ischemic attack"[All Fields] OR ("transient"[All Fields] AND "ischemic"[All Fields] AND "attacks"[All Fields]) OR "transient ischemic attacks"[All Fields]) OR ("aspirin"[MeSH Terms] OR "aspirin"[All Fields]) OR ("clopidogrel"[Supplementary Concept] OR "clopidogrel"[All Fields]) OR (("aspirin"[MeSH Terms] OR "aspirin"[All Fields]) AND ("clopidogrel"[Supplementary Concept] OR "clopidogrel"[All Fields]) AND combination[All Fields]) OR antiplatelets[All Fields] OR ("randomized controlled trial"[Publication Type] OR "randomized controlled trials as topic"[MeSH Terms] OR "randomized controlled trials"[All Fields] OR "randomized controlled trials"[All Fields]))



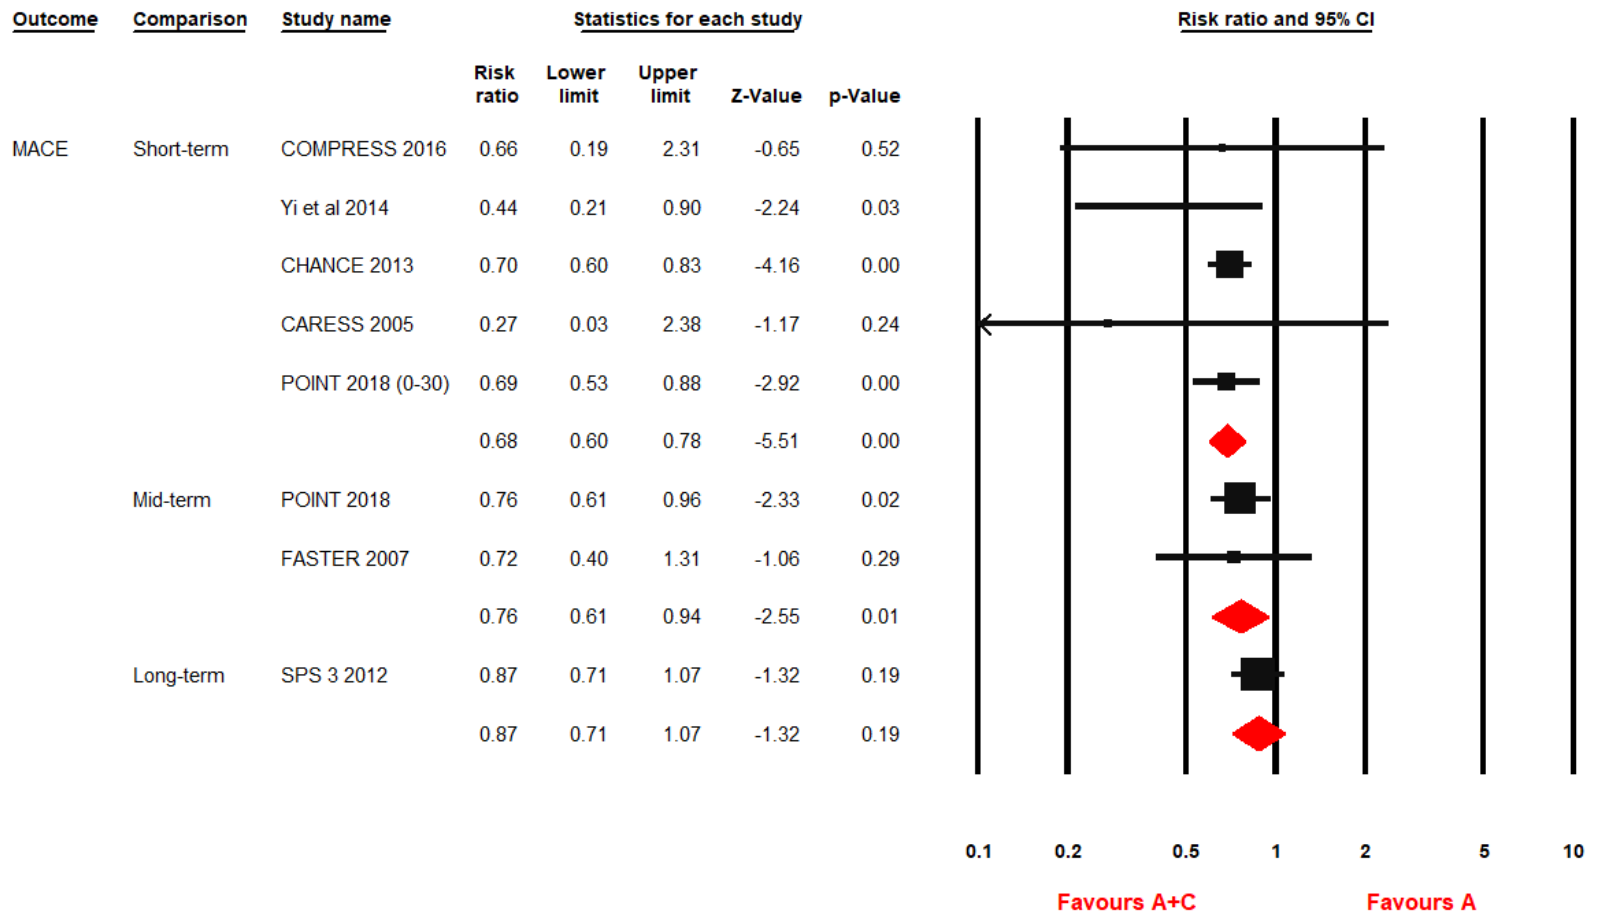

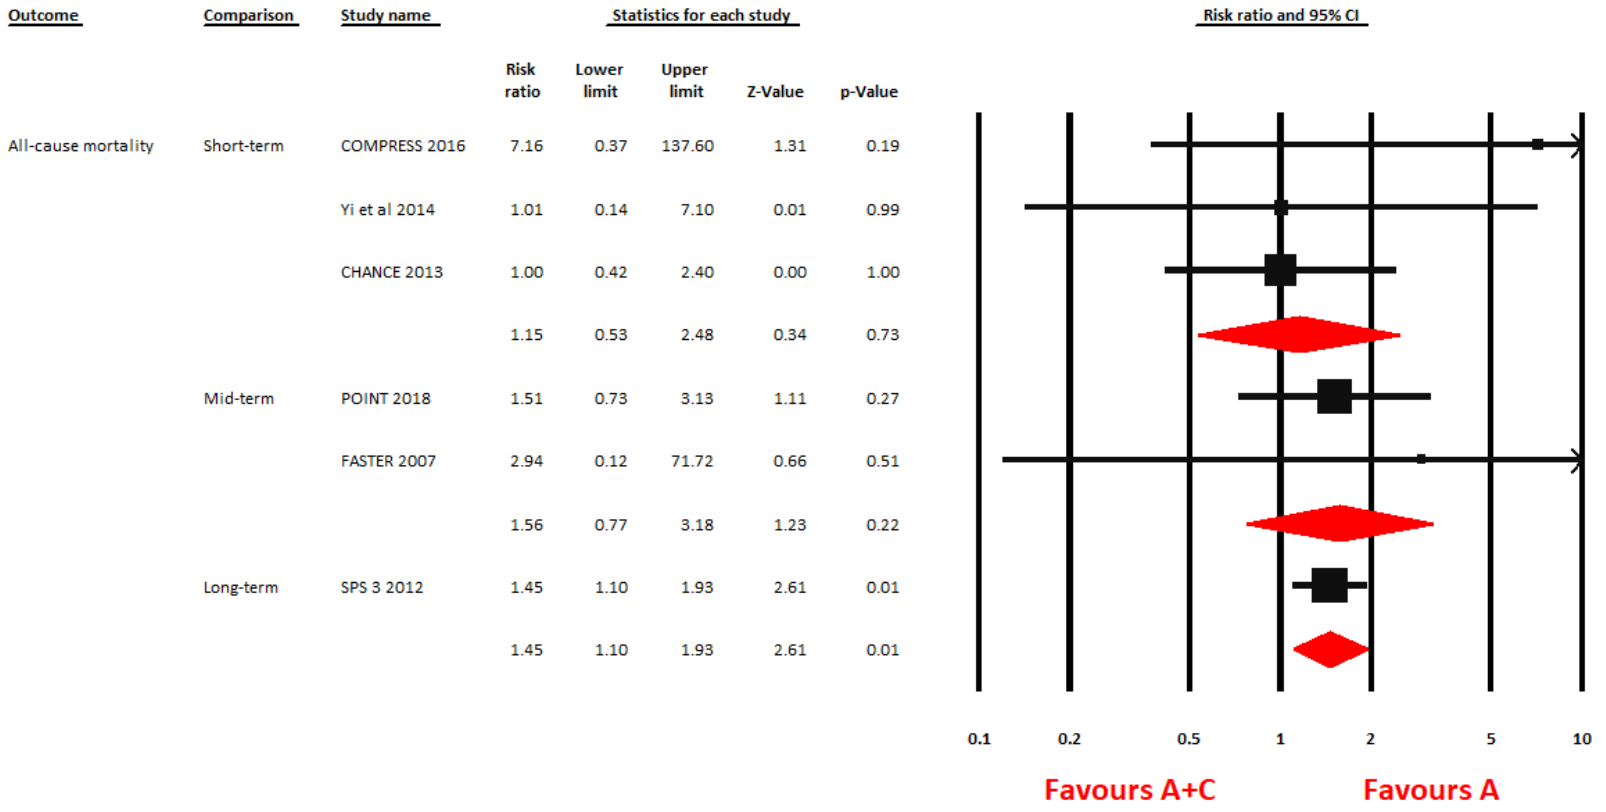

## References:

1. Johnston SC, Easton JD, Farrant M, Barsan W, Conwit RA, Elm JJ, et al. Clopidogrel and aspirin in acute ischemic stroke and high-risk tia. *The New England journal of medicine*. 2018;379:215-225
2. Hong KS, Lee SH, Kim EG, Cho KH, Chang DI, Rha JH, et al. Recurrent ischemic lesions after acute atherothrombotic stroke: Clopidogrel plus aspirin versus aspirin alone. *Stroke*. 2016;47:2323-2330
3. He F, Xia C, Zhang JH, Li XQ, Zhou ZH, Li FP, et al. Clopidogrel plus aspirin versus aspirin alone for preventing early neurological deterioration in patients with acute ischemic stroke. *Journal of clinical neuroscience : official journal of the Neurosurgical Society of Australasia*. 2015;22:83-86
4. Yi X, Lin J, Wang C, Zhang B, Chi W. A comparative study of dual versus monoantiplatelet therapy in patients with acute large-artery atherosclerosis stroke. *Journal of stroke and cerebrovascular diseases : the official journal of National Stroke Association*. 2014;23:1975-1981
5. Wang Y, Wang Y, Zhao X, Liu L, Wang D, Wang C, et al. Clopidogrel with aspirin in acute minor stroke or transient ischemic attack. *The New England journal of medicine*. 2013;369:11-19
6. Benavente OR, Hart RG, McClure LA, Szychowski JM, Coffey CS, Pearce LA. Effects of clopidogrel added to aspirin in patients with recent lacunar stroke. *New England Journal of Medicine*. 2012;367:817-825
7. Wong KS, Chen C, Fu J, Chang HM, Suwanwela NC, Huang YN, et al. Clopidogrel plus aspirin versus aspirin alone for reducing embolisation in patients with acute symptomatic cerebral or carotid artery stenosis (clair study): A randomised, open-label, blinded-endpoint trial. *The Lancet. Neurology*. 2010;9:489-497
8. Kennedy J, Hill MD, Ryckborst KJ, Eliasziw M, Demchuk AM, Buchan AM. Fast assessment of stroke and transient ischaemic attack to prevent early recurrence (faster): A randomised controlled pilot trial. *The Lancet. Neurology*. 2007;6:961-969
9. Bhatt DL, Fox KAA, Hacke W, Berger PB, Black HR, Boden WE, et al. Clopidogrel and aspirin versus aspirin alone for the prevention of atherothrombotic events. *New England Journal of Medicine*. 2006;354:1706-1717
10. Markus HS, Droste DW, Kaps M, Larrue V, Lees KR, Siebler M, et al. Dual antiplatelet therapy with clopidogrel and aspirin in symptomatic carotid stenosis evaluated using doppler embolic signal detection: The clopidogrel and aspirin for reduction of emboli in symptomatic carotid stenosis (caress) trial. *Circulation*. 2005;111:2233-2240
